# Supplementary material
Source: Springer Nature journal article supplement (https://www.springermedizin.de/resource/supplementary/12889_2013_6166_MOESM2_ESM.pdf/9498040)

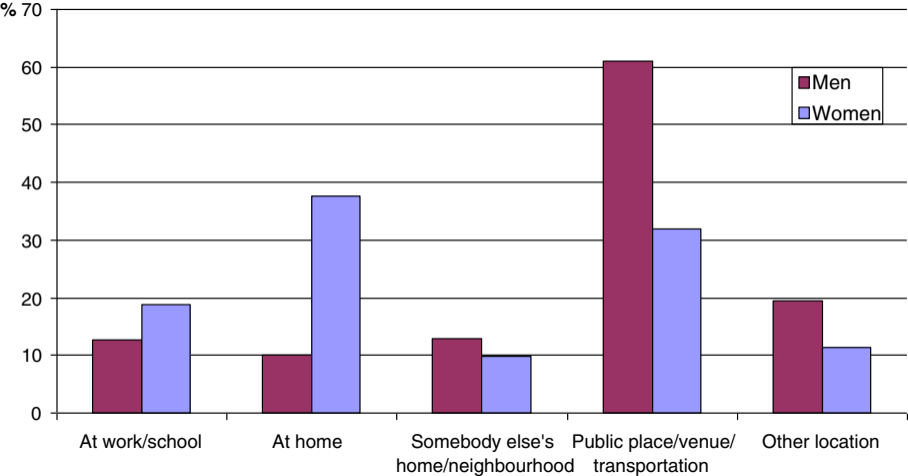

Supplement: MOESM2 [file 9498040]
